# Supplementary material for: The 3-Month Efficacy of Visual Art Training on Observational and Diagnostic Skills Among Nursing Students - A Randomized Controlled Trial
Source: Research Square preprint supplement (doi:10.21203/rs.3.rs-135657/v1), 2021-01-04
Supplement: Supplementary file 1 [file e16fb24dd3043dc71a3c8258.docx]

**The 3-Month Efficacy of Visual Art Training on Observational and Diagnostic Skills Among Nursing Students- A Randomized Controlled Trial**

**Running Title：The Efficacy of Visual Art Training**

**List of All Authors:**

1. **Jia GUO Associate Professor, PhD, RN**

Xiangya School of Nursing, Central South University, Changsha, Hunan Province, China. E-mail: guojia621@163.com

1. **Qinyi ZHONG MSc, RN**

Xiangya School of Nursing, Central South University, Changsha, Hunan Province, China. E-mail: zhongqinyi71@126.com

1. **Ying TANG Assistant Professor, MA**

School of Architecture and Art, Central South University, Changsha, Hunan Province, China. E-mail: 747834866@qq.com

1. **Jiaxin LUO MSc, RN**

Xiangya School of Nursing, Central South University, Changsha, Hunan Province, China. E-mail: 1311032001@qq.com

1. **Hongjuan WANG MSc, RN**

Xiangya School of Nursing, Central South University, Changsha, Hunan Province, China. E-mail: 2573054251@qq.com

1. **Xiaofen QIN MSc, RN**

Hainan General Hospital, Haikou, Hainan Province, China. E-mail: qinxiaofen@csu.edu.cn

1. **Xiuhua WANG Professor, PhD, RN**

Xiangya School of Nursing, Central South University, Changsha, Hunan Province, China. E-mail: 653012790@qq.com

1. **James Allen WILEY Professor, MSc, PhD**

Department of Family and Community Medicine, University of California, San Francisco, the United States. E-mail: [jwiley124@gmail.com](mailto:jwiley124@gmail.com)

**Correspondence to Jia Guo:**

E-mail: guojia621@163.com

Tel: +86 0731-82650290

Address: NO.172 Tongzipo Road Yuelu District, Changsha 410013, China


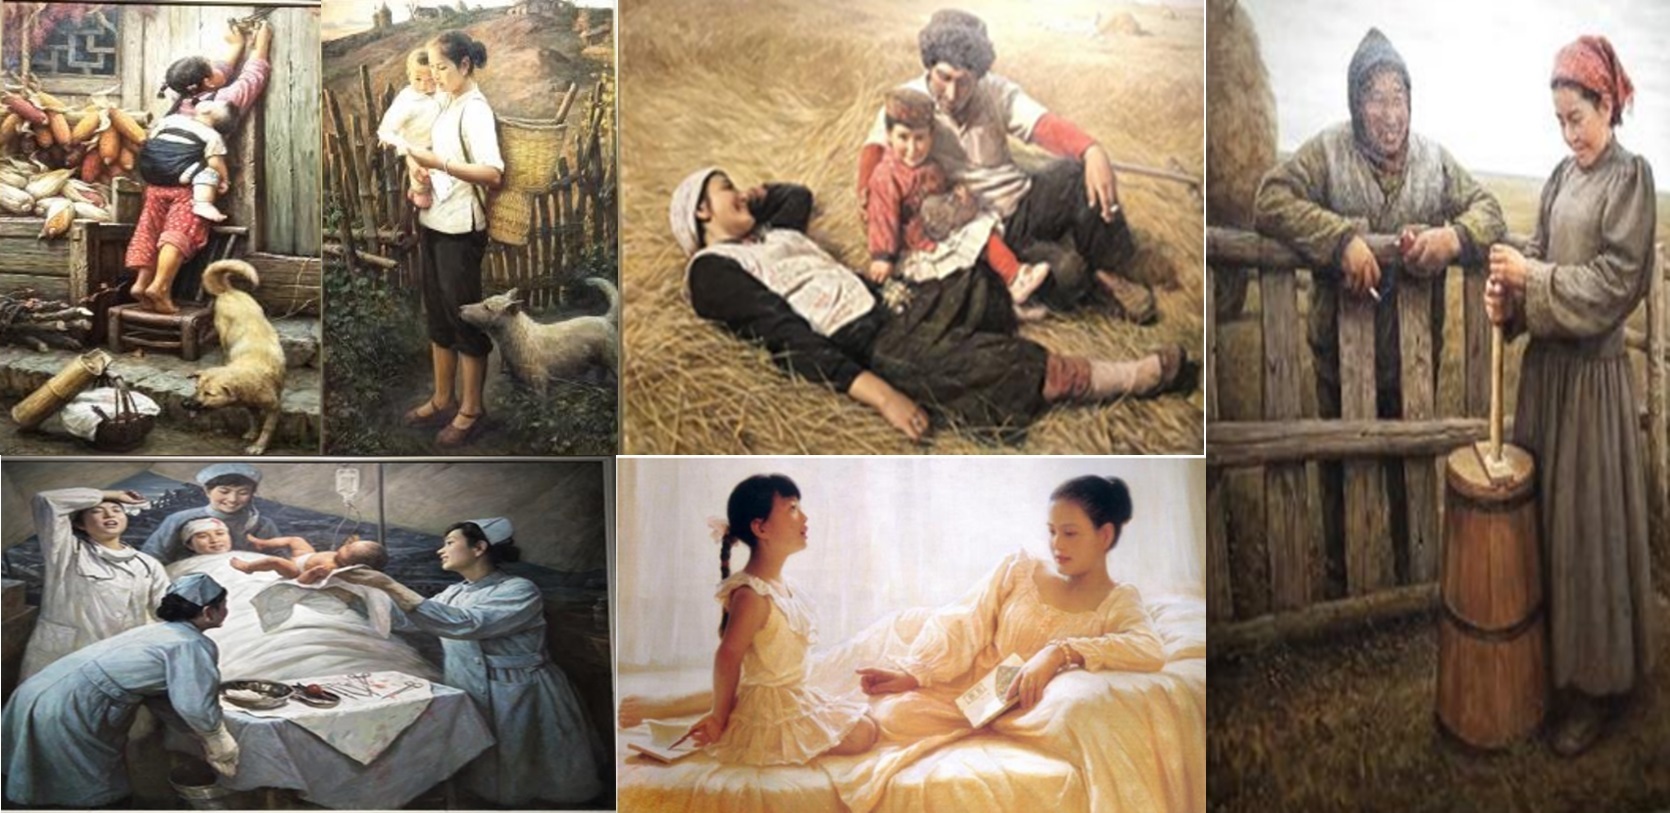


Appendix A: The Chinese art paintings used for museum visit in the study.

*Note.* Li Zijian’s painting reprinted with permission from the Li Zijian Art Museum.


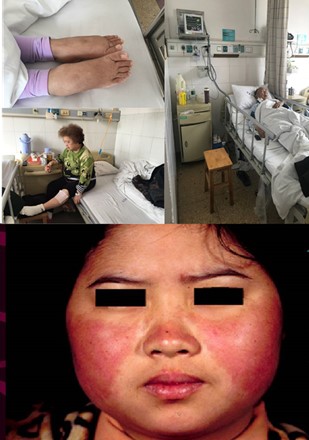

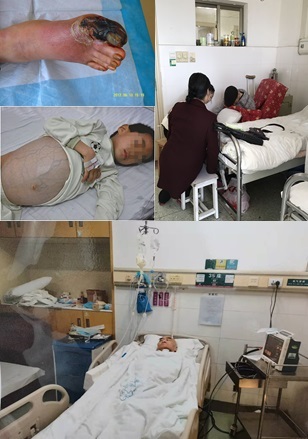


Appendix B: The clinical images used in the study.

*Note.* The images obtained the permissions from patients. Pretest on the left and Posttest on the right.
